# Supplementary material for: Geochronological and Paleomagnetic Constraints on the Lower Cretaceous Dalazi Formation from the Yanji Basin, NE China, and its Tectonic Implication
Source: MDPI journal article supplement (doi:10.3390/min11050527), 2021-05-17
Supplement: s1 [file s1]

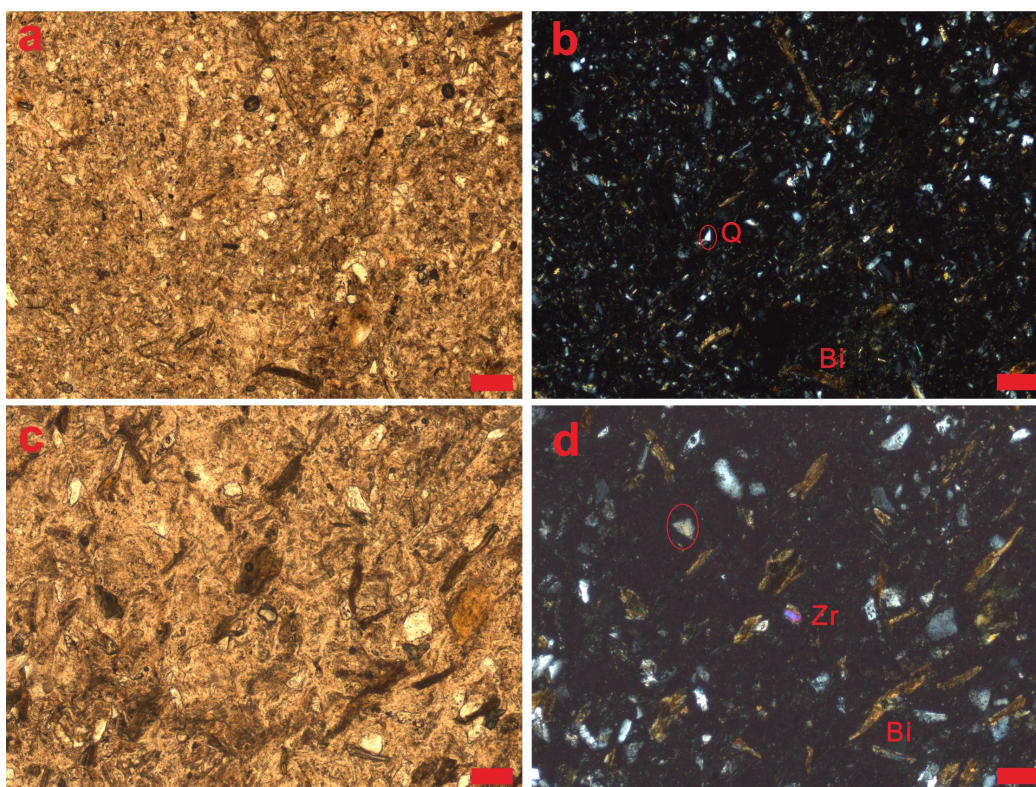

Figure S1. Photomicrographs of XAT15M2 viewed under plane-polarized light and cross-polarized light. Q: Quartz; Bi: Biotite; Zr: Zircon; scale bar 200 $\mu$ m.

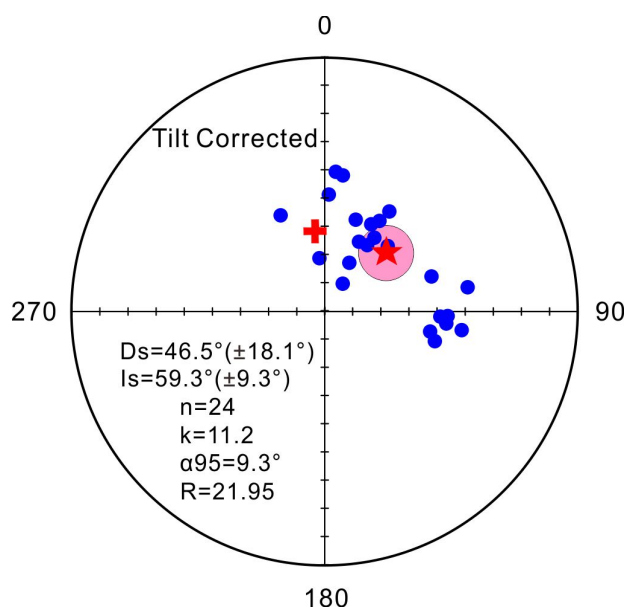

Figure S2. Equal-area projections of the sample-mean direction for ChRM after tilt correction. Red shaded circles around the red stars denote the 95% confidence limit and mean-directions of magnetic components. The red cross-shaped denote the present geomagnetic direction of sampling section.
